# Supplementary material
Source: PubMed Central journal article supplement (PMC7066559)
Supplement: ao9b03839_si_001.pdf [file ao9b03839_si_001.pdf]

## Supporting Information

# Density Functional Theory Calculation on the Structural, Electronic and Optical Properties of Fluorene Based Azo Compounds

*Khurshida Khayer <sup>\*a</sup> and Tahmina Haque <sup>a</sup>*

<sup>a</sup>Department of Chemistry, Jahangirnagar University, Savar, Dhaka-1342, Bangladesh

E-mail: khurshida\_k\_chem@yahoo.com

E-mail: tahmina\_haque75@yahoo.com

\*Corresponding Author, tel. (PABX): (880-2) 7791045-51, Ext. 2016, fax: 880-2-7791052,

e-mail: khurshida\_k\_chem@yahoo.com

## Contents

|                                                                                                                                                                                                                                  |                 |
|----------------------------------------------------------------------------------------------------------------------------------------------------------------------------------------------------------------------------------|-----------------|
| <b>Figure S1.</b> Electronic UV-Vis spectra of (a) DFDZ; (b) DZ by TD-DFT from B3LYP/6-31+G(d,p) calculation by using different initial HF/6-31+G(d,p) geometry.                                                                 | <b>Page S4</b>  |
| <b>Figure S2.</b> A comparison of UV-Vis spectrum for (A) <i>trans</i> - and (B) <i>cis</i> - AzoFL; DZ; DFDZ; and FL made by TD-DFT/B3LYP/6-31+G(d,p) method.                                                                   | <b>Page S5</b>  |
| <b>Figure S3.</b> (a) Vibrational mode (b) frequency (c) IR intensity (d) Raman scattering activities of <i>trans</i> -DZ.                                                                                                       | <b>Page S6</b>  |
| <b>Figure S4.</b> (a) Vibrational mode (b) frequency (c) IR intensity (d) Raman scattering activities of <i>cis</i> -DZ.                                                                                                         | <b>Page S6</b>  |
| <b>Figure S5.</b> (a) Vibrational mode (b) frequency (c) IR intensity (d) Raman scattering activities of <i>trans</i> -DFDZ.                                                                                                     | <b>Page S7</b>  |
| <b>Figure S6.</b> (a) Vibrational mode (b) frequency (c) IR intensity (d) Raman scattering activities of <i>cis</i> -DFDZ.                                                                                                       | <b>Page S7</b>  |
| <b>Figure S7.</b> (a) vibrational mode (b) frequency (c) IR intensity (d) Raman scattering activities of <i>trans</i> -AzoFL.                                                                                                    | <b>Page S8</b>  |
| <b>Figure S8.</b> (a) Vibrational mode (b) frequency (c) IR intensity (d) Raman scattering activities of <i>cis</i> -AzoFL.                                                                                                      | <b>Page S9</b>  |
| <b>Table S1.</b> Absorption wavelengths $\lambda_{\max}$ (nm), excitation energies, $E_{\text{ex}}$ (eV), and oscillator strengths (f) obtained by TD/DFT-B3LYP/6-31+G(d,p) calculation for <i>trans</i> - and <i>cis</i> -DFDZ. | <b>Page S10</b> |
| <b>Table S2.</b> Absorption wavelengths $\lambda_{\max}$ (nm), excitation energies, $E_{\text{ex}}$ (eV), and oscillator strengths (f) obtained by Zindo calculation for all the <i>trans</i> -compounds.                        | <b>Page S11</b> |
| <b>Table S3.</b> Absorption wavelengths $\lambda_{\max}$ (nm), excitation energies, $E_{\text{ex}}$ (eV), and oscillator strengths (f) obtained by Zindo calculation for all the <i>cis</i> -compounds.                          | <b>Page S12</b> |
| <b>Table S4.</b> Calculated vibrational frequencies of FL with DFT-B3LYP//6-31+G(d,p) in the ground state.                                                                                                                       | <b>Page S13</b> |
| <b>Table S5.</b> Cartesian co-ordinates for the ground state geometry of <i>trans</i> -AzoFL at DFT-B3LYP//6-31+G(d,p) level.                                                                                                    | <b>Page S15</b> |
| <b>Table S6.</b> Cartesian co-ordinates for the ground state geometry of <i>cis</i> -AzoFL at DFT-B3LYP//6-31+G(d,p) level                                                                                                       | <b>Page S17</b> |

|                                                                                                                              |                 |
|------------------------------------------------------------------------------------------------------------------------------|-----------------|
| <b>Table S7.</b> Cartesian co-ordinates for the ground state geometry of <i>trans</i> -DFDZ at DFT-B3LYP//6-31+G(d,p) level. | <b>Page S19</b> |
| <b>Table S8.</b> Cartesian co-ordinates for the ground state geometry of <i>cis</i> -DFDZ at DFT-B3LYP//6-31+G(d,p) level    | <b>Page S19</b> |
| <b>Table S9.</b> Cartesian co-ordinates for the ground state geometry of <i>trans</i> -DZ at DFT-B3LYP//6-31+G(d,p) level.   | <b>Page S20</b> |
| <b>Table S10.</b> Cartesian co-ordinates for the ground state geometry of <i>cis</i> -DZ at DFT-B3LYP//6-31+G(d,p) level.    | <b>Page S20</b> |
| <b>Table S11.</b> Cartesian co-ordinates for the ground state geometry of FL at DFT-B3LYP//6-31+G(d,p) level.                | <b>Page S21</b> |

Figures (from DFT-B3LYP/6-31+G(d,p) calculation)

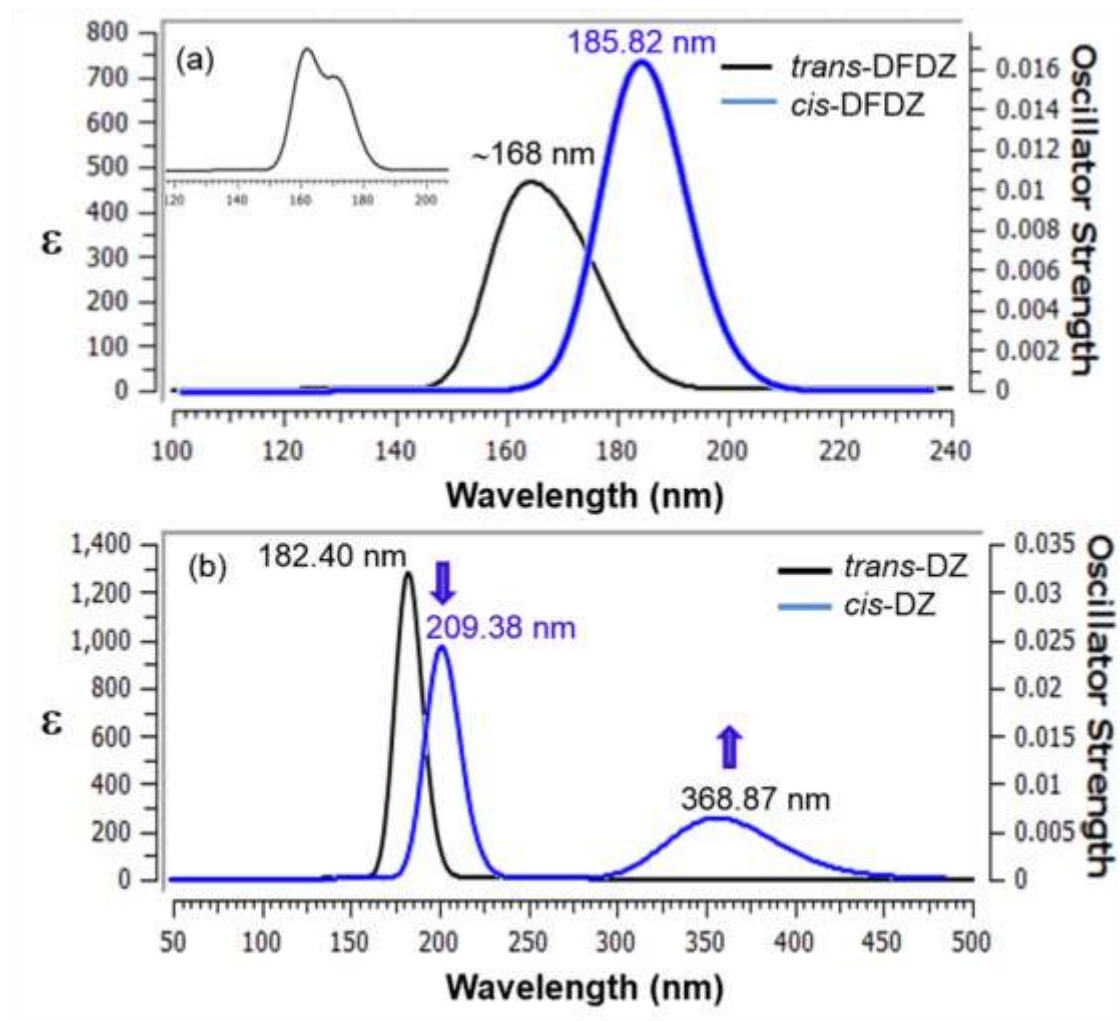

**Figure S1.** Electronic UV-Vis spectra of (a) DFDZ; (b) DZ by TD-DFT from B3LYP/6-31+G(d,p) calculation by using different initial HF/6-31+G(d,p) geometry. The calculated UV-Vis spectra are represented with a Gaussian UV-Vis peak half-width at half height 0.333 eV. The inset spectrum of *trans*-DFDZ (a) is shown from Gaussian UV-Vis peak half-width at half height 0.233 eV.

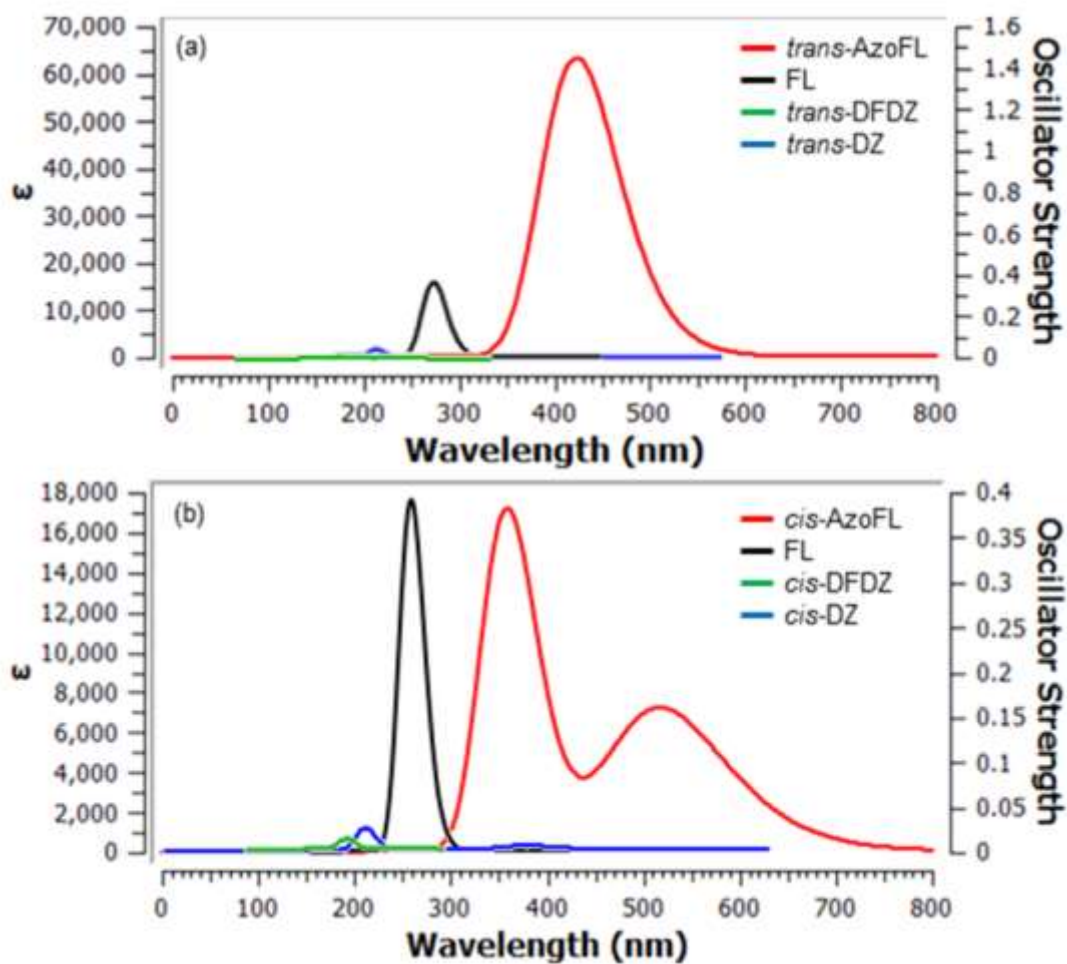

**Figure S2.** A comparison of UV-Vis spectra for (a) *trans*- and (b) *cis*-isomers of AzoFL (red line); DZ (blue line); DFDZ (green line); FL (black line) calculated by TD-DFT/B3LYP/6-31+G(d,p) method (All the starting geometries are obtained from DFT/B3LYP/6-31+G(d,p) method). The calculated UV-Vis spectra are represented with a Gaussian UV-Vis peak half-width at half height 0.333 eV.

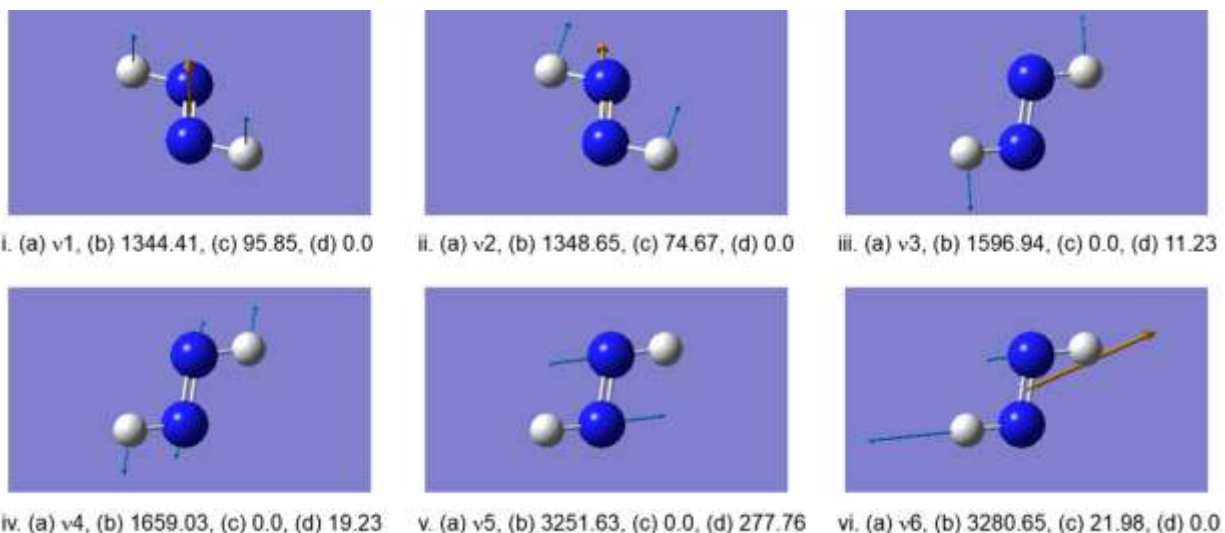

**Figure S3.** (a) vibrational mode (b) frequency (c) IR intensity (d) Raman scattering activities of *trans*-DZ; (i) out-of-plane vibration of HNN (ii) in-plane vibration of HNN (iii) in-plane vibration of HNNH; (iv) stretching vibration of N=N (v) symmetric stretching vibration of N-H (vi) asymmetric stretching vibration of N-H. Displacement vector and dipole derivative unit vector are shown in each figure.

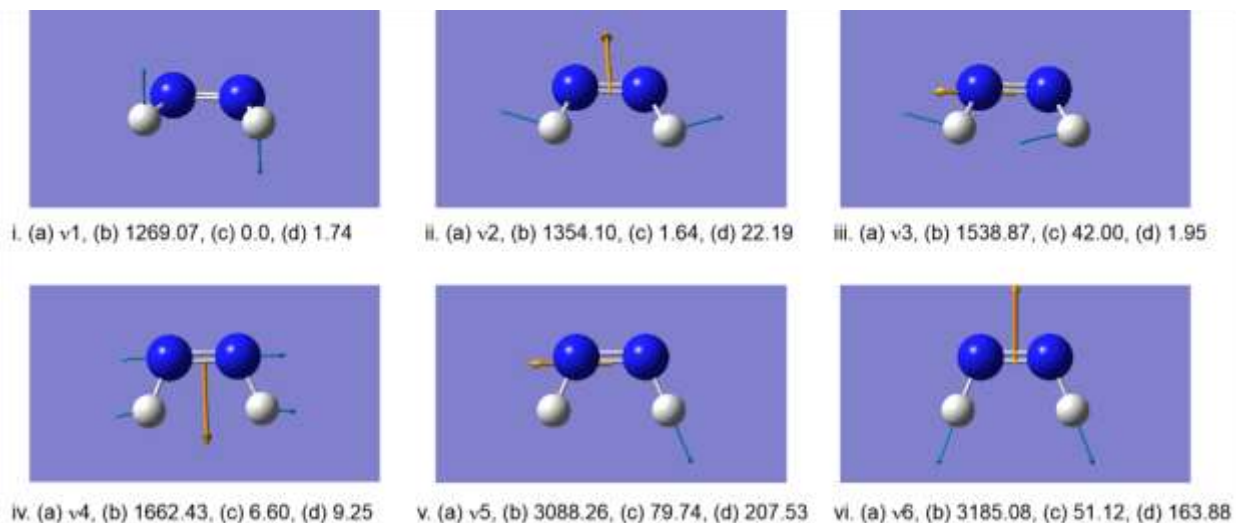

**Figure S4.** (a) vibrational mode (b) frequency (c) IR intensity (d) Raman scattering activities of *cis*-DZ; Top left to right, (i) out-of-plane vibration of HNN (ii) in-plane vibration of HNNH (sci) (iii) in-plane vibration of HNNH (roc); Bottom left to right (iv) stretching vibration of N=N (v) asymmetric stretching vibration of N-H (vi) symmetric stretching vibration of N-H. Displacement vector and dipole derivative unit vector are shown in each figure.

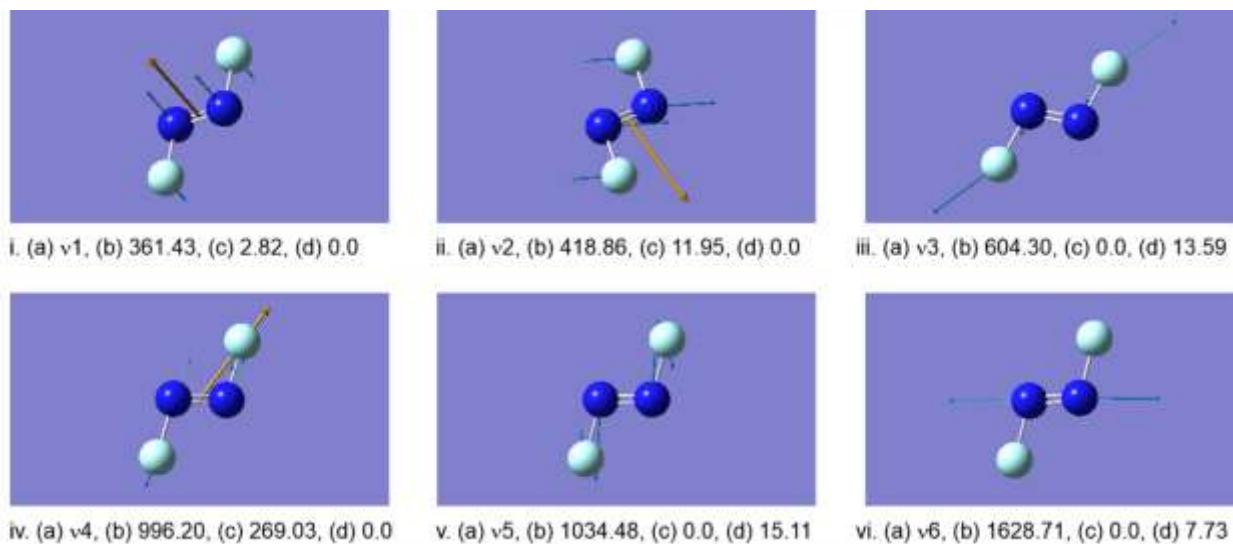

**Figure S5.** (a) vibrational mode (b) frequency (c) IR intensity (d) Raman scattering activities of *trans*-DFDZ; (i) out-of-plane vibration of FNN, (ii) in-plane vibration of FNN, (iii) defm. FN NF, (iv) asymmetric stretching vibration of N-F + ip NN, (v) symmetric stretching vibration of N-F + defm FNN, (vi) stretching vibration of N=N.

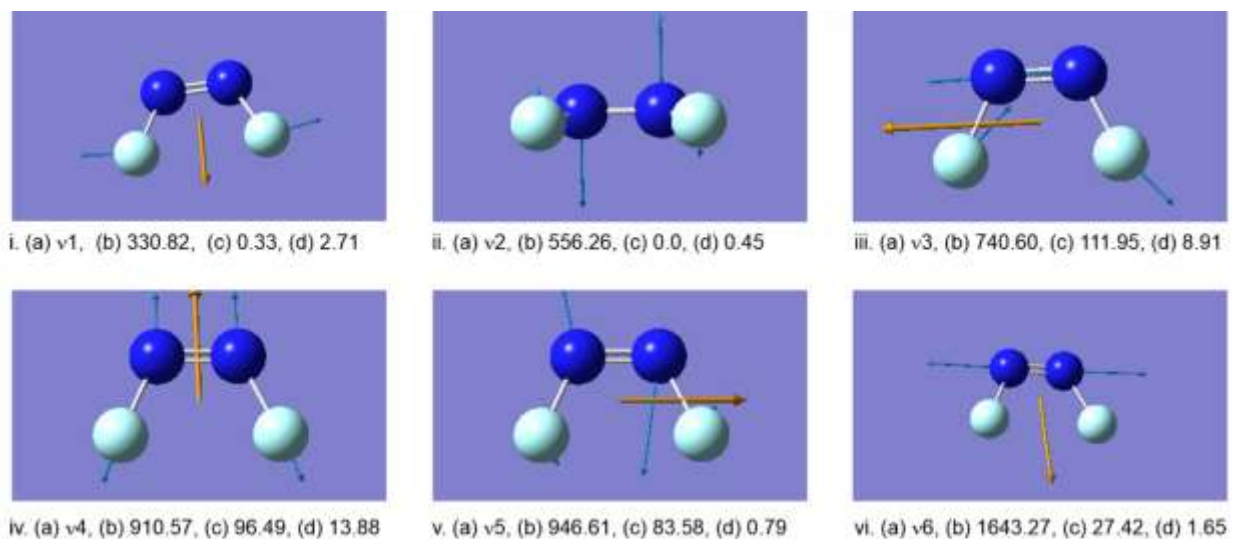

**Figure S6.** (a) vibrational mode (b) frequency (c) IR intensity (d) Raman scattering activities of *cis*-DFDZ; (i) in-plane vibration (sci) of FN NF (ii) out-of-plane vibration of FN F (iii) in-plane vibration (defm) of FNN; Bottom left to right (iv) symmetric stretching vibration of N-F + ip (NN) (v) asymmetric stretching vibration of N-F + ip (NN) (vi) stretching vibration of N=N. Displacement vector and dipole derivative unit vector are shown in each figure.

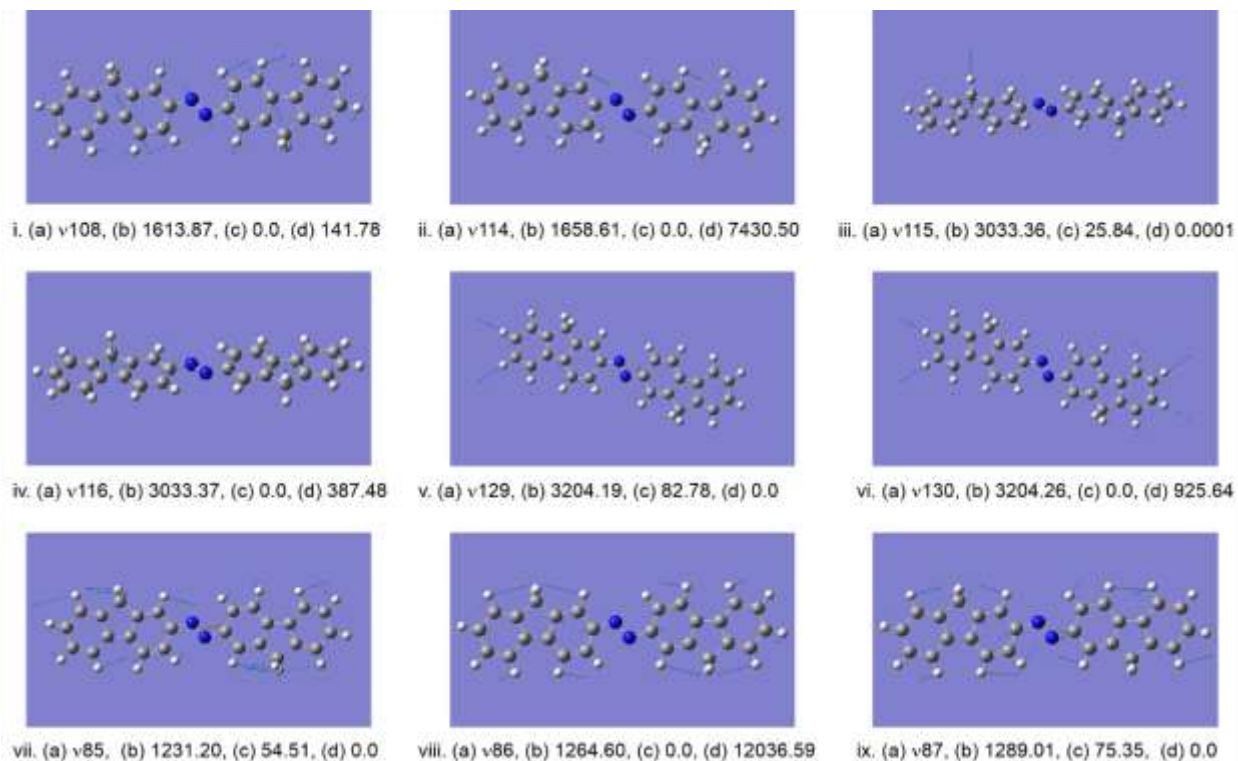

**Figure S7.** (a) vibrational mode (b) frequency (c) IR intensity (d) Raman scattering activities of *trans*-AzoFL; Top left to right, stretching vibration of (i) N=N (ii) C=C (iii) C<sub>9</sub>-H. Middle left to right, stretching vibration of (iv) C<sub>9</sub>-H (v) + (vi) C-H. Bottom left to right (vii) - (ix) stretching vibration of C-N. Displacement vector and dipole derivative unit vector are shown in each figure.



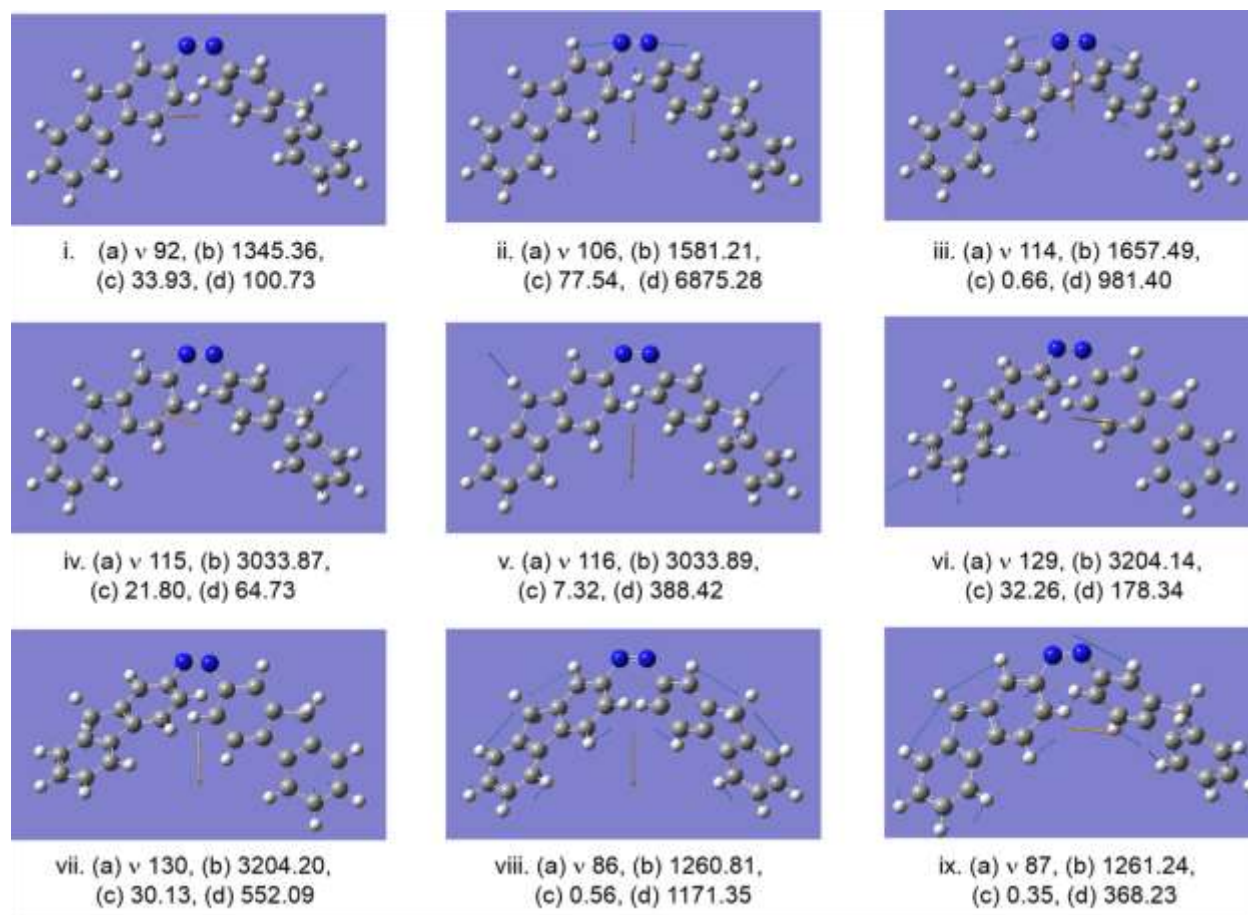

**Figure S8.** (a) vibrational mode (b) frequency (c) IR intensity (d) Raman scattering activities of *cis*-AzoFL; Top left to right, stretching vibration of (i) C=C (ii) N=N (iii) C=C. Middle left to right, stretching vibration of (iv) C<sub>9</sub>-H (v) C<sub>9</sub>-H (vi) C-H. Bottom left to right, stretching vibration of (vii) C-H (viii) - (ix) C-N. Displacement vector and dipole derivative unit vector are shown in each figure.

**Tables (from DFT-B3LYP//6-31+G(d,p) calculation)**

**Table S1.** Absorption wavelengths  $\lambda_{\max}$  (nm), excitation energies,  $E_{\text{ex}}$  (eV), and oscillator strengths (f) obtained by TD/DFT-B3LYP/6-31+G(d,p) calculation for *trans*- and *cis*-DFDZ.

| compound                        | electronic transition          | $\lambda_{\max}$ | f      | $E_x$  | MO <sup>a</sup> | MO <sup>b</sup> | sym <sup>c</sup> | wave function <sup>d,e</sup> |
|---------------------------------|--------------------------------|------------------|--------|--------|-----------------|-----------------|------------------|------------------------------|
| <i>trans</i> -DFDZ <sup>f</sup> | S <sub>0</sub> →S <sub>1</sub> | 219.74           | 0.0000 | 5.6423 | 16→17           | 0.70627         | BG               | H→L (99%)                    |
|                                 | S <sub>0</sub> →S <sub>2</sub> | 172.36           | 0.0067 | 7.1931 | 15→17           | 0.39596         | BU               | H-1→L (31%)                  |
|                                 |                                |                  |        |        | 16→18           | 0.58059         |                  | H→L+1 (67%)                  |
| S <sub>0</sub> →S <sub>3</sub>  | 161.62                         | 0.0092           | 7.6712 | 14→17  | 0.70553         | AU              | H-2→L (99%)      |                              |
| <i>cis</i> -DFDZ <sup>f</sup>   | S <sub>0</sub> →S <sub>1</sub> | 185.82           | 0.0181 | 6.6722 | 15→18           | 0.12561         | B1               | H-1→L +1 (3%)                |
|                                 |                                |                  |        |        | 16→17           | 0.69511         |                  | H→L (96%)                    |
|                                 | S <sub>0</sub> →S <sub>2</sub> | 185.81           | 0.0000 | 6.6725 | 14→17           | 0.70646         | A2               | H-2→L (99%)                  |
|                                 | S <sub>0</sub> →S <sub>3</sub> | 166.23           | 0.0001 | 7.4585 | 15→17           | 0.45034         | B2               | H-1→L (40%)                  |
|                                 |                                |                  |        |        | 16→18           | 0.53729         |                  | H→L+1 (57%)                  |

<sup>a</sup>molecular orbitals involved in the transition; <sup>b</sup>molecular orbital coefficients; <sup>c</sup>sym, orbital symmetry-singlet, <sup>d</sup>the wave functions based on the eigenvectors predicted by TD-DFT. H and L are used to denote the HOMO and LUMO. <sup>e</sup>percentage of contribution obtained by  $(100 \times c \times c \times 2)$ , where c is the coefficient. <sup>f</sup>calculated by TD/DFT-B3LYP/6-31+G(d,p) from initial optimized geometry of HF/6-31+G(d,p).

**Table S2.** Absorption wavelengths  $\lambda_{\max}$  (nm), excitation energies,  $E_{\text{ex}}$  (eV), and oscillator strengths (f) obtained by Zindo calculation for all the *trans*-compounds.

| compound            | electronic transition          | $\lambda_{\max}$ | f      | Ex     | MO <sup>a</sup> | MO <sup>b</sup>     | sym <sup>c</sup> | wave functions <sup>d, e</sup> |
|---------------------|--------------------------------|------------------|--------|--------|-----------------|---------------------|------------------|--------------------------------|
| <i>trans</i> -DZ    | S <sub>0</sub> →S <sub>1</sub> | 516.76           | 0.00   | 2.187  | 6→7             | 0.70682             | BG               | H→L (99%)                      |
|                     | S <sub>0</sub> →S <sub>2</sub> | 149.71           | 0.0678 | 8.2816 | 4→7             | 0.70641             | AU               | H-2→L (99%)                    |
|                     | S <sub>0</sub> →S <sub>3</sub> | 140.80           | 0.4735 | 8.8057 | 5→7<br>6→8      | 0.61645<br>-0.31624 | BU               | H-1→L (76%)<br>H→L+1 (20%)     |
| <i>trans</i> -DFDZ  | S <sub>0</sub> →S <sub>1</sub> | 299.65           | 0.00   | 4.1464 | 11→13           | 0.70255             | BG               | H-1→L (99%)                    |
|                     | S <sub>0</sub> →S <sub>2</sub> | 175.65           | 0.4028 | 7.0586 | 11→14<br>12→13  | 0.10889<br>0.68740  | BU               | H-1→L+1 (2%)<br>H→L (94%)      |
|                     | S <sub>0</sub> →S <sub>3</sub> | 163.06           | 0.0524 | 7.6037 | 6→13<br>10→13   | -0.12114<br>0.69654 | AU               | H-6→L (2%)<br>H-2→L (97%)      |
| <i>trans</i> -AzoFL | S <sub>0</sub> →S <sub>1</sub> | 562.02           | 0.0105 | 2.2060 | 59→67           | 0.54484             | B                | H-7→L (59%)                    |
|                     | 59→69                          |                  |        |        | -0.22990        | H-7→L+2 (10%)       |                  |                                |
|                     | 59→75                          |                  |        |        | -0.17517        | H-7→L+8 (6%)        |                  |                                |
| <i>trans</i> -AzoFL | S <sub>0</sub> →S <sub>2</sub> | 387.20           | 1.5678 | 3.2021 | 60→67           | -0.25208            | B                | H-6→L (12%)                    |
|                     | 60→69                          |                  |        |        | 0.10699         | H-6→L+2 (2%)        |                  |                                |
|                     | 59→67                          |                  |        |        | -0.12483        | H-7→L (3%)          |                  |                                |
| <i>trans</i> -AzoFL | S <sub>0</sub> →S <sub>3</sub> | 315.04           | 0.0001 | 3.9355 | 65→68           | -0.17920            | A                | H-1→L+1 (6%)                   |
|                     | 66→67                          |                  |        |        | 0.65144         | H→L (84%)           |                  |                                |
|                     | 61→67                          |                  |        |        | -0.16091        | H-5→L (5%)          |                  |                                |
| <i>trans</i> -AzoFL | S <sub>0</sub> →S <sub>3</sub> | 315.04           | 0.0001 | 3.9355 | 63→67           | -0.20113            | A                | H-5→L (8%)                     |
|                     | 65→67                          |                  |        |        | 0.50612         | H-1→L (5%)          |                  |                                |
|                     | 65→69                          |                  |        |        | 0.12328         | H-1→L+2 (3%)        |                  |                                |
| <i>trans</i> -AzoFL | S <sub>0</sub> →S <sub>3</sub> | 315.04           | 0.0001 | 3.9355 | 66→68           | -0.29902            | A                | H→L+1 (17%)                    |
|                     | 66→72                          |                  |        |        | -0.10089        | H→L+5 (3%)          |                  |                                |
|                     | 29→32                          |                  |        |        | -0.12494        | H-2→L (3%)          |                  |                                |
| <i>trans</i> -FL    | S <sub>0</sub> →S <sub>1</sub> | 296.84           | 0.4446 | 4.1767 | 29→34           | 0.10311             | B2               | H-2→L+2 (2%)                   |
|                     | 30→35                          |                  |        |        | 0.10860         | H-1→L+3 (2%)        |                  |                                |
|                     | 31→32                          |                  |        |        | 0.64994         | H→L (84%)           |                  |                                |
| <i>trans</i> -FL    | S <sub>0</sub> →S <sub>2</sub> | 289.59           | 0.0001 | 4.2814 | 28→34           | 0.17669             | A1               | H-3→L+2 (6%)                   |
|                     | 29→35                          |                  |        |        | -0.19150        | H-2→L+3(7%)         |                  |                                |
|                     | 30→32                          |                  |        |        | 0.43639         | H-1→L (38%)         |                  |                                |
| <i>trans</i> -FL    | S <sub>0</sub> →S <sub>3</sub> | 281.39           | 0.0170 | 3.9355 | 31→33           | 0.48450             | B2               | H→L+1 (46%)                    |
|                     | 28→33                          |                  |        |        | -0.17851        | H-3→L+1 (6%)        |                  |                                |
|                     | 29→32                          |                  |        |        | -0.31462        | H-2→L (19%)         |                  |                                |
| <i>trans</i> -FL    | S <sub>0</sub> →S <sub>3</sub> | 281.39           | 0.0170 | 3.9355 | 30→35           | 0.18954             | B2               | H-1→L+3 (7%)                   |
|                     | 31→32                          |                  |        |        | 0.15709         | H→L (4%)            |                  |                                |
|                     | 31→34                          |                  |        |        | -0.54432        | H→L+2 (59%)         |                  |                                |

<sup>a</sup>molecular orbitals involved in the transition; <sup>b</sup>molecular orbital coefficients; <sup>c</sup>symmetry, singlet, <sup>d</sup>the wave functions based on the eigenvectors predicted by ZIndo. H and L are used to denote the HOMO and LUMO. <sup>e</sup>percentage of contribution obtained by (100×c×c×2), where c is the co-efficient.

**Table S3.** Absorption wavelengths  $\lambda_{\max}$  (nm), excitation energies,  $E_{\text{ex}}$  (eV), and oscillator strengths (f) obtained by Zindo calculation for all the *cis*-compounds.

| compound                       | electronic transition          | $\lambda_{\max}$ | f      | Ex     | MO <sup>a</sup>   | MO <sup>b</sup>               | sym <sup>c</sup> | wave functions <sup>d, e</sup>            |
|--------------------------------|--------------------------------|------------------|--------|--------|-------------------|-------------------------------|------------------|-------------------------------------------|
| <i>cis</i> -DZ                 | S <sub>0</sub> →S <sub>1</sub> | 524.24           | 0.0114 | 2.365  | 6→7               | 0.70705                       | B1               | H→L (99%)                                 |
|                                | S <sub>0</sub> →S <sub>2</sub> | 191.59           | 0.00   | 6.4715 | 4→7               | 0.70692                       | A2               | H-2→L (100%)                              |
|                                | S <sub>0</sub> →S <sub>3</sub> | 135.98           | 0.5269 | 9.1177 | 4→8<br>5→7<br>6→9 | 0.17997<br>0.65437<br>0.16893 | B2               | H-2→L+1 (6%)<br>H-1→L (85%)<br>H→L+2 (5%) |
| <i>cis</i> -DFDZ               | S <sub>0</sub> →S <sub>1</sub> | 238.90           | 0.00   | 5.1899 | 6→13<br>10→13     | 0.12831<br>0.69519            | A2               | H-6→L (3%)<br>H-2→L (96%)                 |
|                                | S <sub>0</sub> →S <sub>2</sub> | 233.92           | 0.0543 | 5.3002 | 11→13             | 0.70441                       | B1               | H-1→L (99%)                               |
|                                | S <sub>0</sub> →S <sub>3</sub> | 169.51           | 0.3671 | 7.3142 | 10→14<br>12→13    | -0.16009<br>0.68023           | B2               | H-2→L+1 (5%)<br>H→L (92%)                 |
| <i>cis</i> -AzoFL              | S <sub>0</sub> →S <sub>1</sub> | 545.64           | 0.0252 | 2.2723 | 59→67             | 0.24310                       | B                | H-7→L (11%)                               |
|                                |                                |                  |        |        | 59→69             | 0.13732                       |                  | H-7→L+2 (3%)                              |
|                                |                                |                  |        |        | 60→67             | 0.47247                       |                  | H-6→L (44%)                               |
|                                |                                |                  |        |        | 60→69             | 0.26253                       |                  | H-6→L+2 (13%)                             |
|                                |                                |                  |        |        | 60→75             | 0.13889                       |                  | H-6→L+8 (3%)                              |
|                                |                                |                  |        |        | 62→67             | -0.11113                      |                  | H-4→L (2%)                                |
| 66→67                          | 0.22933                        | H→L (10%)        |        |        |                   |                               |                  |                                           |
| S <sub>0</sub> →S <sub>2</sub> | 355.21                         | 0.7533           | 3.4905 | 59→67  | -0.18188          | B                             | H-7→L (6%)       |                                           |
|                                |                                |                  |        | 59→69  | -0.10053          |                               | H-7→L+2 (2%)     |                                           |
|                                |                                |                  |        | 65→68  | -0.21342          |                               | H-7→L+1 (9%)     |                                           |
|                                |                                |                  |        | 66→67  | 0.60186           |                               | H→L (72%)        |                                           |
| S <sub>0</sub> →S <sub>3</sub> | 316.74                         | 0.2766           | 3.9144 | 58→67  | -0.19128          | A                             | H-8→L+2 (7%)     |                                           |
|                                |                                |                  |        | 58→69  | -0.10813          |                               | H-8→L+2 (2)      |                                           |
|                                |                                |                  |        | 65→67  | 0.57314           |                               | H-1→L (65%)      |                                           |
|                                |                                |                  |        | 66→68  | -0.24780          |                               | H→L+1 (12%)      |                                           |

<sup>a</sup>molecular orbitals involved in the transition; <sup>b</sup>molecular orbital coefficients; <sup>c</sup>symmetry, singlet, <sup>d</sup>the wave functions based on the eigenvectors predicted by TD-DFT. H and L are used to denote the HOMO and LUMO. <sup>e</sup>percentage of contribution obtained by  $(100 \times c \times c \times 2)$ , where c is the co-efficient.

**Table S4.** Calculated vibrational frequencies of FL with B3LYP/6-31+G(d,p) in the ground state

| mode no. | sym <sup>a</sup> | freq <sup>b</sup> | I <sub>IR</sub> <sup>c</sup> | I <sub>Raman</sub> <sup>d</sup> | k <sup>e</sup> | approximate description of mode <sup>f</sup>                                   |
|----------|------------------|-------------------|------------------------------|---------------------------------|----------------|--------------------------------------------------------------------------------|
| 1        | B1               | 99.79             | 0.6106                       | 0.1252                          | 0.0249         | butterfly mode                                                                 |
| 2        | A2               | 138.13            | 0.0000                       | 0.0073                          | 0.0415         | twist FL ring                                                                  |
| 3        | A1               | 216.71            | 0.2216                       | 0.4608                          | 0.1211         | ip FL ring                                                                     |
| 4        | B1               | 243.42            | 7.4453                       | 0.6364                          | 0.0745         | oop C <sub>9</sub> Hs                                                          |
| 5        | A2               | 279.12            | 0.0000                       | 4.8240                          | 0.2023         | twist (ring A, ring C) + twist C <sub>9</sub> Hs                               |
| 6        | A1               | 419.18            | 0.4243                       | 7.3573                          | 0.6694         | tor FL ring                                                                    |
| 7        | B1               | 425.03            | 6.3887                       | 0.0015                          | 0.3031         | twist (ring A CHs + ring C CHs)                                                |
| 8        | A2               | 443.20            | 0.0000                       | 0.8933                          | 0.3315         | roc CHs + wag C <sub>9</sub> Hs                                                |
| 9        | B1               | 482.23            | 0.8224                       | 0.0241                          | 0.4080         | twist (ring A + ring C) + wag C <sub>9</sub> Hs                                |
| 10       | B2               | 497.06            | 0.3277                       | 0.1978                          | 0.5996         | defm FL ring                                                                   |
| 11       | B2               | 551.51            | 0.1584                       | 10.5162                         | 1.0167         | defm CCC + defm C <sub>9</sub> H                                               |
| 12       | A2               | 577.61            | 0.0000                       | 0.0709                          | 0.6784         | wag CHs                                                                        |
| 13       | B2               | 634.11            | 7.6790                       | 0.3109                          | 1.6397         | defm CCC                                                                       |
| 14       | A1               | 642.18            | 0.2985                       | 0.3431                          | 1.4907         | wag all CHs                                                                    |
| 15       | B1               | 708.01            | 5.0470                       | 0.0123                          | 0.9303         | wag (CHs ring A, C) + wag C <sub>9</sub> Hs                                    |
| 16       | A2               | 739.75            | 0.0000                       | 1.9170                          | 0.5129         | twist (CHs ring A, C) + twist C <sub>9</sub> Hs                                |
| 17       | B1               | 754.23            | 134.9046                     | 0.1000                          | 0.4216         | wag CHs                                                                        |
| 18       | A1               | 754.67            | 0.0327                       | 31.7300                         | 1.7922         | breathing FL ring                                                              |
| 19       | A2               | 795.98            | 0.0000                       | 4.5570                          | 0.8247         | twist (CHs ring A, CHs ring C) + defm C <sub>9</sub> Hs + twist CC             |
| 20       | B2               | 813.37            | 0.4222                       | 0.1359                          | 1.4850         | ip CCC + ip C <sub>9</sub> Hs                                                  |
| 21       | A1               | 851.15            | 0.0780                       | 36.5986                         | 2.2582         | ip CCC + ip C <sub>9</sub> Hs                                                  |
| 22       | B1               | 871.81            | 0.5936                       | 1.0956                          | 0.5780         | twist (CHs ring A + CHs ring C) + defm C <sub>9</sub> Hs                       |
| 23       | A2               | 881.31            | 0.0000                       | 0.0337                          | 0.6488         | twist (CHs ring A + CHs ring C) + oop C <sub>9</sub> Hs                        |
| 24       | B1               | 932.16            | 0.0054                       | 0.0742                          | 0.8039         | twist (CHs ring A + CHs ring C) + oop C <sub>9</sub> Hs                        |
| 25       | A2               | 952.17            | 0.0000                       | 0.0886                          | 0.7536         | twist (CHs ring A + CHs ring C) + twist C <sub>9</sub> Hs                      |
| 26       | B1               | 975.51            | 3.8353                       | 0.1005                          | 1.0424         | twist (CHs ring A + CHs ring C) + oop C <sub>9</sub> Hs                        |
| 27       | A2               | 989.66            | 0.0000                       | 0.6224                          | 0.7474         | twist (CHs ring A + CHs ring C)                                                |
| 28       | B1               | 991.17            | 0.0500                       | 0.0569                          | 0.7444         | twist (CHs ring A + CHs ring C) + twist CC                                     |
| 29       | B2               | 1021.77           | 3.7746                       | 0.4091                          | 4.2253         | asym (breathing ring A, ring C) + ip C <sub>11</sub> -C <sub>12</sub> + ip CCC |
| 30       | A1               | 1047.15           | 0.8604                       | 82.3985                         | 1.4502         | sym (Breathing ring A, ring C) + ip CCC + defm CHs                             |
| 31       | B2               | 1052.43           | 6.5428                       | 0.1496                          | 1.3279         | breathing (ring A, ring C) + roc CHs                                           |
| 32       | A1               | 1117.24           | 3.0875                       | 11.9926                         | 1.5366         | roc CHs + sci CHs                                                              |
| 33       | B2               | 1131.19           | 0.1197                       | 0.0289                          | 1.2637         | roc CHs + sci CHs                                                              |
| 34       | A2               | 1155.58           | 0.0000                       | 3.0002                          | 0.8965         | twist C <sub>9</sub> Hs                                                        |
| 35       | B2               | 1177.41           | 0.0377                       | 6.8809                          | 1.0490         | sci CHs + wag C <sub>9</sub> Hs                                                |
| 36       | A1               | 1181.55           | 0.0038                       | 24.8983                         | 0.9303         | sci CHs                                                                        |
| 37       | B2               | 1192.54           | 2.8540                       | 1.8082                          | 1.2297         | sci CHs + C <sub>9</sub> Hs                                                    |
| 38       | A1               | 1207.66           | 2.9012                       | 16.8263                         | 2.1703         | sci CHs                                                                        |
| 39       | B2               | 1223.69           | 3.3013                       | 21.6854                         | 1.6194         | roc (C <sub>4</sub> H, C <sub>5</sub> H)                                       |

|    |    |         |         |          |         |                                                                         |
|----|----|---------|---------|----------|---------|-------------------------------------------------------------------------|
| 40 | A1 | 1257.30 | 3.1240  | 139.6773 | 2.2601  | sci (C <sub>1</sub> H, C <sub>8</sub> H)                                |
| 41 | A1 | 1323.95 | 0.4659  | 178.8203 | 1.9643  | roc CHs                                                                 |
| 42 | B2 | 1333.51 | 0.3893  | 1.0205   | 1.7467  | roc CHs                                                                 |
| 43 | B2 | 1357.03 | 10.2519 | 5.2452   | 4.9852  | str Ar (C=C)+ sci CHs                                                   |
| 44 | A1 | 1386.23 | 0.1349  | 42.7804  | 5.1304  | breathing B ring + str Ar (C=C)                                         |
| 45 | A1 | 1454.09 | 9.6680  | 27.3033  | 1.4122  | sci C <sub>9</sub> Hs                                                   |
| 46 | A1 | 1481.63 | 9.0249  | 11.0564  | 3.1120  | roc (ring A + ring C)+ sci (ring A + ring C)                            |
| 47 | B2 | 1487.48 | 17.4768 | 1.2401   | 2.9181  | roc (ring A + ring C)+ sci (ring A + ring C)                            |
| 48 | A1 | 1513.66 | 0.1243  | 134.7581 | 3.9939  | roc (ring A + ring C)+ sci (ring A + ring C)<br>+ sci C <sub>9</sub> Hs |
| 49 | B2 | 1514.29 | 7.4190  | 8.9593   | 3.5263  | roc (ring A + ring C)                                                   |
| 50 | A1 | 1623.76 | 1.1380  | 41.3439  | 8.6135  | str Ar (C=C)                                                            |
| 51 | B2 | 1628.97 | 0.8982  | 0.3711   | 10.0846 | str Ar (C=C)                                                            |
| 52 | A1 | 1654.80 | 0.0234  | 549.3156 | 10.2798 | str Ar (C=C)                                                            |
| 53 | B2 | 1654.87 | 4.2392  | 13.0053  | 10.8983 | str Ar (C=C)                                                            |
| 54 | A1 | 3032.08 | 15.2969 | 190.8769 | 5.7423  | sym str (C <sub>9</sub> Hs)                                             |
| 55 | B1 | 3060.75 | 7.4160  | 88.2854  | 6.0833  | asym str C <sub>9</sub> Hs                                              |
| 56 | B2 | 3173.37 | 2.5548  | 0.0949   | 6.4459  | asym str (CH ring A + CH ring C)                                        |
| 57 | A1 | 3173.71 | 10.0959 | 89.5906  | 6.4483  | sym str + asym str (CH ring A + CH ring C)                              |
| 58 | B2 | 3179.55 | 2.3614  | 133.3531 | 6.4824  | asym str (CH ring A + CH ring C)                                        |
| 59 | A1 | 3181.13 | 4.4774  | 77.4502  | 6.4889  | asym str (CH ring A + CH ring C)                                        |
| 60 | B2 | 3190.85 | 7.2431  | 92.4392  | 6.5554  | asym str (CH ring A + CH ring C)                                        |
| 61 | A1 | 3192.06 | 41.4633 | 101.8711 | 6.5598  | asym str (CH ring A + CH ring C)                                        |
| 62 | B2 | 3203.15 | 48.7240 | 7.5319   | 6.6325  | asym str (CH ring A, CH ring C)                                         |
| 63 | A1 | 3203.80 | 5.9494  | 626.8632 | 6.6347  | sym str (all CH ring C, CH ring A)                                      |

<sup>a</sup>Sym, symmetry. <sup>b</sup>Vibrational frequencies in cm<sup>-1</sup>. <sup>c</sup>Infrared intensities in KM/Mol. <sup>d</sup>Raman scattering activities in A<sup>4</sup>/AMU. <sup>e</sup>k, Force constants in mDyne/A. <sup>f</sup>defm, deformation; tor, torsion; str, stretching; sym, symmetric; asym, asymmetric; oop, out-of-plane; ip, in-plane; sci, scissoring; roc, rocking; wag, waging.

**Table S5.** Cartesian co-ordinates for the ground state geometry of *trans*-AzoFL at DFT-B3LYP//6-31+G(d,p) level.

| -----  |        |        |                         |           |           |
|--------|--------|--------|-------------------------|-----------|-----------|
| Center | Atomic | Atomic | Coordinates (Angstroms) |           |           |
| Number | Number | Type   | X                       | Y         | Z         |
| -----  |        |        |                         |           |           |
| 1      | 7      | 0      | 0.473594                | 0.416715  | 0.000076  |
| 2      | 7      | 0      | -0.473594               | -0.416715 | 0.000076  |
| 3      | 6      | 0      | 0.086498                | 1.776909  | 0.000154  |
| 4      | 6      | 0      | 1.147193                | 2.701284  | -0.000177 |
| 5      | 6      | 0      | -1.250770               | 2.229093  | 0.000485  |
| 6      | 6      | 0      | 0.864637                | 4.060200  | -0.000173 |
| 7      | 1      | 0      | 2.165118                | 2.321819  | -0.000416 |
| 8      | 6      | 0      | -1.531069               | 3.590475  | 0.000529  |
| 9      | 1      | 0      | -2.048044               | 1.495038  | 0.000721  |
| 10     | 6      | 0      | 1.812088                | 5.242917  | -0.000480 |
| 11     | 6      | 0      | -0.472545               | 4.511834  | 0.000181  |
| 12     | 1      | 0      | -2.562706               | 3.931638  | 0.000811  |
| 13     | 1      | 0      | 2.467727                | 5.241866  | -0.881428 |
| 14     | 6      | 0      | 0.866861                | 6.427600  | -0.000345 |
| 15     | 1      | 0      | 2.468042                | 5.242041  | 0.880241  |
| 16     | 6      | 0      | -0.472545               | 5.978432  | 0.000056  |
| 17     | 6      | 0      | 1.153252                | 7.789435  | -0.000498 |
| 18     | 6      | 0      | -1.528598               | 6.896078  | 0.000308  |
| 19     | 6      | 0      | 0.094288                | 8.706825  | -0.000244 |
| 20     | 1      | 0      | 2.181560                | 8.142115  | -0.000821 |
| 21     | 6      | 0      | -1.234777               | 8.262047  | 0.000159  |

|    |   |   |           |           |           |
|----|---|---|-----------|-----------|-----------|
| 22 | 1 | 0 | -2.561152 | 6.558176  | 0.000623  |
| 23 | 1 | 0 | 0.304779  | 9.772381  | -0.000363 |
| 24 | 1 | 0 | -2.043748 | 8.986872  | 0.000363  |
| 25 | 6 | 0 | -0.086498 | -1.776909 | 0.000154  |
| 26 | 6 | 0 | -1.147193 | -2.701284 | -0.000177 |
| 27 | 6 | 0 | 1.250770  | -2.229093 | 0.000485  |
| 28 | 6 | 0 | -0.864637 | -4.060200 | -0.000173 |
| 29 | 1 | 0 | -2.165118 | -2.321819 | -0.000416 |
| 30 | 6 | 0 | 1.531069  | -3.590475 | 0.000529  |
| 31 | 1 | 0 | 2.048044  | -1.495038 | 0.000721  |
| 32 | 6 | 0 | -1.812088 | -5.242917 | -0.000480 |
| 33 | 6 | 0 | 0.472545  | -4.511834 | 0.000181  |
| 34 | 1 | 0 | 2.562706  | -3.931638 | 0.000811  |
| 35 | 1 | 0 | -2.467727 | -5.241866 | -0.881428 |
| 36 | 6 | 0 | -0.866861 | -6.427600 | -0.000345 |
| 37 | 1 | 0 | -2.468042 | -5.242041 | 0.880241  |
| 38 | 6 | 0 | 0.472545  | -5.978432 | 0.000056  |
| 39 | 6 | 0 | -1.153252 | -7.789435 | -0.000498 |
| 40 | 6 | 0 | 1.528598  | -6.896078 | 0.000308  |
| 41 | 6 | 0 | -0.094288 | -8.706825 | -0.000244 |
| 42 | 1 | 0 | -2.181560 | -8.142115 | -0.000821 |
| 43 | 6 | 0 | 1.234777  | -8.262047 | 0.000159  |
| 44 | 1 | 0 | 2.561152  | -6.558176 | 0.000623  |
| 45 | 1 | 0 | -0.304779 | -9.772381 | -0.000363 |
| 46 | 1 | 0 | 2.043748  | -8.986872 | 0.000363  |

-----



**Table S6.** Cartesian co-ordinates for the ground state geometry of *cis*-AzoFL at DFT-B3LYP//6-31+G(d,p) level

| Center<br>Number | Atomic<br>Number | Atomic<br>Type | Coordinates (Angstroms) |           |           |
|------------------|------------------|----------------|-------------------------|-----------|-----------|
|                  |                  |                | X                       | Y         | Z         |
| 1                | 7                | 0              | -0.082658               | 0.620291  | -3.279123 |
| 2                | 7                | 0              | 0.082658                | -0.620291 | -3.279123 |
| 3                | 6                | 0              | -0.077704               | 1.437061  | -2.102050 |
| 4                | 6                | 0              | -1.013112               | 2.486252  | -2.074498 |
| 5                | 6                | 0              | 0.920161                | 1.348788  | -1.112948 |
| 6                | 6                | 0              | -0.990898               | 3.383159  | -1.015622 |
| 7                | 1                | 0              | -1.735776               | 2.566989  | -2.881911 |
| 8                | 6                | 0              | 0.965413                | 2.276258  | -0.073834 |
| 9                | 1                | 0              | 1.665110                | 0.563014  | -1.170084 |
| 10               | 6                | 0              | -1.895851               | 4.567168  | -0.739083 |
| 11               | 6                | 0              | -0.001497               | 3.286304  | -0.012134 |
| 12               | 1                | 0              | 1.748680                | 2.207445  | 0.675784  |
| 13               | 1                | 0              | -2.943194               | 4.261700  | -0.614300 |
| 14               | 6                | 0              | -1.316110               | 5.139369  | 0.539356  |
| 15               | 1                | 0              | -1.876255               | 5.295581  | -1.560625 |
| 16               | 6                | 0              | -0.202466               | 4.374837  | 0.951501  |
| 17               | 6                | 0              | -1.728290               | 6.241547  | 1.282243  |
| 18               | 6                | 0              | 0.501331                | 4.715383  | 2.111250  |
| 19               | 6                | 0              | -1.022596               | 6.580875  | 2.444148  |
| 20               | 1                | 0              | -2.584316               | 6.834603  | 0.970264  |
| 21               | 6                | 0              | 0.082658                | 5.822961  | 2.853505  |

|    |   |   |           |           |           |
|----|---|---|-----------|-----------|-----------|
| 22 | 1 | 0 | 1.359370  | 4.132595  | 2.434624  |
| 23 | 1 | 0 | -1.334362 | 7.438916  | 3.032559  |
| 24 | 1 | 0 | 0.619096  | 6.099678  | 3.756546  |
| 25 | 6 | 0 | 0.077704  | -1.437061 | -2.102050 |
| 26 | 6 | 0 | 1.013112  | -2.486252 | -2.074498 |
| 27 | 6 | 0 | -0.920161 | -1.348788 | -1.112948 |
| 28 | 6 | 0 | 0.990898  | -3.383159 | -1.015622 |
| 29 | 1 | 0 | 1.735776  | -2.566989 | -2.881911 |
| 30 | 6 | 0 | -0.965413 | -2.276258 | -0.073834 |
| 31 | 1 | 0 | -1.665110 | -0.563014 | -1.170084 |
| 32 | 6 | 0 | 1.895851  | -4.567168 | -0.739083 |
| 33 | 6 | 0 | 0.001497  | -3.286304 | -0.012134 |
| 34 | 1 | 0 | -1.748680 | -2.207445 | 0.675784  |
| 35 | 1 | 0 | 2.943194  | -4.261700 | -0.614300 |
| 36 | 6 | 0 | 1.316110  | -5.139369 | 0.539356  |
| 37 | 1 | 0 | 1.876255  | -5.295581 | -1.560625 |
| 38 | 6 | 0 | 0.202466  | -4.374837 | 0.951501  |
| 39 | 6 | 0 | 1.728290  | -6.241547 | 1.282243  |
| 40 | 6 | 0 | -0.501331 | -4.715383 | 2.111250  |
| 41 | 6 | 0 | 1.022596  | -6.580875 | 2.444148  |
| 42 | 1 | 0 | 2.584316  | -6.834603 | 0.970264  |
| 43 | 6 | 0 | -0.082658 | -5.822961 | 2.853505  |
| 44 | 1 | 0 | -1.359370 | -4.132595 | 2.434624  |
| 45 | 1 | 0 | 1.334362  | -7.438916 | 3.032559  |
| 46 | 1 | 0 | -0.619096 | -6.099678 | 3.756546  |

-----

**Table S7.** Cartesian co-ordinates for the ground state geometry of *trans*-DFDZ at DFT-B3LYP//6-31+G(d,p) level.

---

| Center<br>Number | Atomic<br>Number | Atomic<br>Type | Coordinates (Angstroms) |           |          |
|------------------|------------------|----------------|-------------------------|-----------|----------|
|                  |                  |                | X                       | Y         | Z        |
| 1                | 9                | 0              | 0.591248                | 1.554890  | 0.000000 |
| 2                | 7                | 0              | 0.591248                | 0.159907  | 0.000000 |
| 3                | 7                | 0              | -0.591248               | -0.159907 | 0.000000 |
| 4                | 9                | 0              | -0.591248               | -1.554890 | 0.000000 |

---

**Table S8.** Cartesian co-ordinates for the ground state geometry of *cis*-DFDZ at DFT-B3LYP//6-31+G(d,p) level.

---

| Center<br>Number | Atomic<br>Number | Atomic<br>Type | Coordinates (Angstroms) |           |           |
|------------------|------------------|----------------|-------------------------|-----------|-----------|
|                  |                  |                | X                       | Y         | Z         |
| 1                | 9                | 0              | 0.000000                | 1.198097  | -0.555025 |
| 2                | 7                | 0              | 0.000000                | 0.608341  | 0.713603  |
| 3                | 7                | 0              | 0.000000                | -0.608341 | 0.713603  |
| 4                | 9                | 0              | 0.000000                | -1.198097 | -0.555025 |

---

**Table S9.** Cartesian co-ordinates for the ground state geometry of *trans*-DZ at DFT-B3LYP//6-31+G(d,p) level.

---

| Center<br>Number | Atomic<br>Number | Atomic<br>Type | Coordinates (Angstroms) |           |          |
|------------------|------------------|----------------|-------------------------|-----------|----------|
|                  |                  |                | X                       | Y         | Z        |
| 1                | 1                | 0              | -0.992451               | 0.920407  | 0.000000 |
| 2                | 7                | 0              | 0.000000                | 0.622151  | 0.000000 |
| 3                | 7                | 0              | 0.000000                | -0.622151 | 0.000000 |
| 4                | 1                | 0              | 0.992451                | -0.920407 | 0.000000 |

---

**Table S10.** Cartesian co-ordinates for the ground state geometry of *cis*-DZ at DFT-B3LYP//6-31+G(d,p) level.

---

| Center<br>Number | Atomic<br>Number | Atomic<br>Type | Coordinates (Angstroms) |           |           |
|------------------|------------------|----------------|-------------------------|-----------|-----------|
|                  |                  |                | X                       | Y         | Z         |
| 1                | 1                | 0              | 0.000000                | 1.028268  | 0.840028  |
| 2                | 7                | 0              | 0.000000                | 0.620857  | -0.120004 |
| 3                | 7                | 0              | 0.000000                | -0.620857 | -0.120004 |
| 4                | 1                | 0              | 0.000000                | -1.028268 | 0.840028  |

---

**Table S11.** Cartesian co-ordinates for the ground state geometry of FL at DFT-B3LYP//6-31+G(d,p) level.

| -----  |        |        |                         |           |           |
|--------|--------|--------|-------------------------|-----------|-----------|
| Center | Atomic | Atomic | Coordinates (Angstroms) |           |           |
| Number | Number | Type   | X                       | Y         | Z         |
| -----  |        |        |                         |           |           |
| 1      | 1      | 0      | -0.880530               | 0.000000  | 2.489546  |
| 2      | 6      | 0      | 0.000000                | 3.019587  | -1.212779 |
| 3      | 6      | 0      | 0.000000                | 3.465051  | 0.115426  |
| 4      | 6      | 0      | 0.000000                | 2.546664  | 1.173849  |
| 5      | 6      | 0      | 0.000000                | 1.184758  | 0.887221  |
| 6      | 6      | 0      | 0.000000                | 0.735210  | -0.450760 |
| 7      | 6      | 0      | 0.000000                | 1.652504  | -1.505774 |
| 8      | 1      | 0      | 0.000000                | 3.743218  | -2.022880 |
| 9      | 1      | 0      | 0.000000                | 4.530406  | 0.326880  |
| 10     | 1      | 0      | 0.000000                | 2.899475  | 2.202209  |
| 11     | 1      | 0      | 0.000000                | 1.315207  | -2.538586 |
| 12     | 6      | 0      | 0.000000                | 0.000000  | 1.833244  |
| 13     | 1      | 0      | 0.880530                | 0.000000  | 2.489546  |
| 14     | 6      | 0      | 0.000000                | -1.184758 | 0.887221  |
| 15     | 6      | 0      | 0.000000                | -2.546664 | 1.173849  |
| 16     | 6      | 0      | 0.000000                | -3.465051 | 0.115426  |
| 17     | 6      | 0      | 0.000000                | -3.019587 | -1.212779 |
| 18     | 6      | 0      | 0.000000                | -1.652504 | -1.505774 |
| 19     | 6      | 0      | 0.000000                | -0.735210 | -0.450760 |
| 20     | 1      | 0      | 0.000000                | -2.899475 | 2.202209  |
| 21     | 1      | 0      | 0.000000                | -4.530406 | 0.326880  |
| 22     | 1      | 0      | 0.000000                | -3.743218 | -2.022880 |
| 23     | 1      | 0      | 0.000000                | -1.315207 | -2.538586 |
| -----  |        |        |                         |           |           |
